# Supplementary material for: The effect of incorporating carboxylic acid functionalities into 2,2′-bipyridine on the biological activity of the complexes formed: synthesis, structure, DNA/protein interaction, antioxidant activity and cytotoxicity
Source: Royal Society of Chemistry journal article supplement (doi:10.1039/c7ra00425g), 2017-01-01
Supplement: c7ra00425g1.pdf [file c7ra00425g1.pdf]

# **ELECTRONIC SUPPLEMENTARY**

## **INFORMATION FOR:**

### **The effect of incorporation of carboxylic acid functionalities in 2,2'-bipyridine on the biological activity of the complexes formed: Synthesis, structure, DNA/protein interaction, antioxidant activity and cytotoxicity**

Thangavel Sathiya Kamatchi,<sup>a</sup> Nataraj Chitrapriya,<sup>b</sup> Sarvana Loganathan Ashok Kumar,<sup>c</sup> Jang Yoon Jung,<sup>b</sup> Frank R. Fronczek,<sup>c</sup> Horst Puschmann,<sup>d</sup> Karuppannan Natarajan<sup>\*a</sup>

<sup>a</sup>*Department of Chemistry, Bharathiar University, Coimbatore 641046, India.*

*E-mail: k\_natraj6@yahoo.com; Tel.: +91 422 2428319; Fax: +91 422 2422387.*

<sup>b</sup>*Department of Chemistry, Yeungnam University, Gyeongsan City, Gyeong-buk, 712-749, Republic of Korea.*

<sup>c</sup>*Department of Chemistry, Louisiana State University, Baton Rouge, LA 70803, USA.*

<sup>d</sup>*Department of Chemistry, Durham University, Durham, DH1 3KE, UK.*

## Table of Contents

- (1) **Fig. S1**  $^1\text{H}$  NMR spectrum of complex **1**
- (2) **Table S1** Selected geometrical parameters for complexes **1** and **3**
- (3) **Fig. S2** Plot of  $[\text{DNA}]/(\varepsilon_a - \varepsilon_f)$  vs  $[\text{DNA}]$  for the titration of CT-DNA with complexes **1-3**
- (4) **Table S2** Correlation equation and  $R^2$  value of complexes **1-3** for plot of  $[\text{DNA}]/(\varepsilon_a - \varepsilon_f)$  vs  $[\text{DNA}]$
- (5) **Table S3** Correlation equation and  $R^2$  value for EB-DNA fluorescence quenching by complexes **1-3**
- (6) **Fig. S3** Stern–Volmer plots for EB–DNA quenching by the ruthenium complexes at different temperatures
- (7) **Table S4** Correlation equation and  $R^2$  value of **1-3** for Stern–Volmer plots for EB–DNA quenching by the ruthenium complexes at different temperatures
- (8) **Table S5** Correlation equation and  $R^2$  value of EB and complexes on viscosity of DNA
- (9) **Fig. S4** UV-Visible absorption spectra of BSA in the absence and presence of the complexes **1-3**
- (10) **Fig. S5** Plot of  $I_0/I$  vs  $\log [Q]$
- (11) **Table S6** Correlation equation and  $R^2$  value of complexes **1-3** for Plot of  $I_0/I$  vs  $\log [Q]$
- (12) **Fig. S6** Plot of  $\log [(F_0-F)/F]$  vs  $\log [Q]$
- (13) **Table S7** Correlation equation and  $R^2$  value of the complexes **1-3** for Plot of  $\log [(F_0-F)/F]$  vs  $\log [Q]$
- (14) **Fig. S7** Synchronous spectra of BSA ( $1 \mu\text{M}$ ) in the presence of increasing amounts of the complexes **1-3** for a wavelength difference of  $\Delta\lambda = 15 \text{ nm}$ .
- (15) **Fig. S8** Synchronous spectra of BSA ( $1 \mu\text{M}$ ) in the presence of increasing amounts of the complexes **1-3** for a wavelength difference of  $\Delta\lambda = 60 \text{ nm}$ .
- (16) **Fig. S9** Plausible mechanisms for DPPH radical scavenging and metal chelating activity for complex **3**

Fig. S1 <sup>1</sup>H NMR spectrum of complex 1

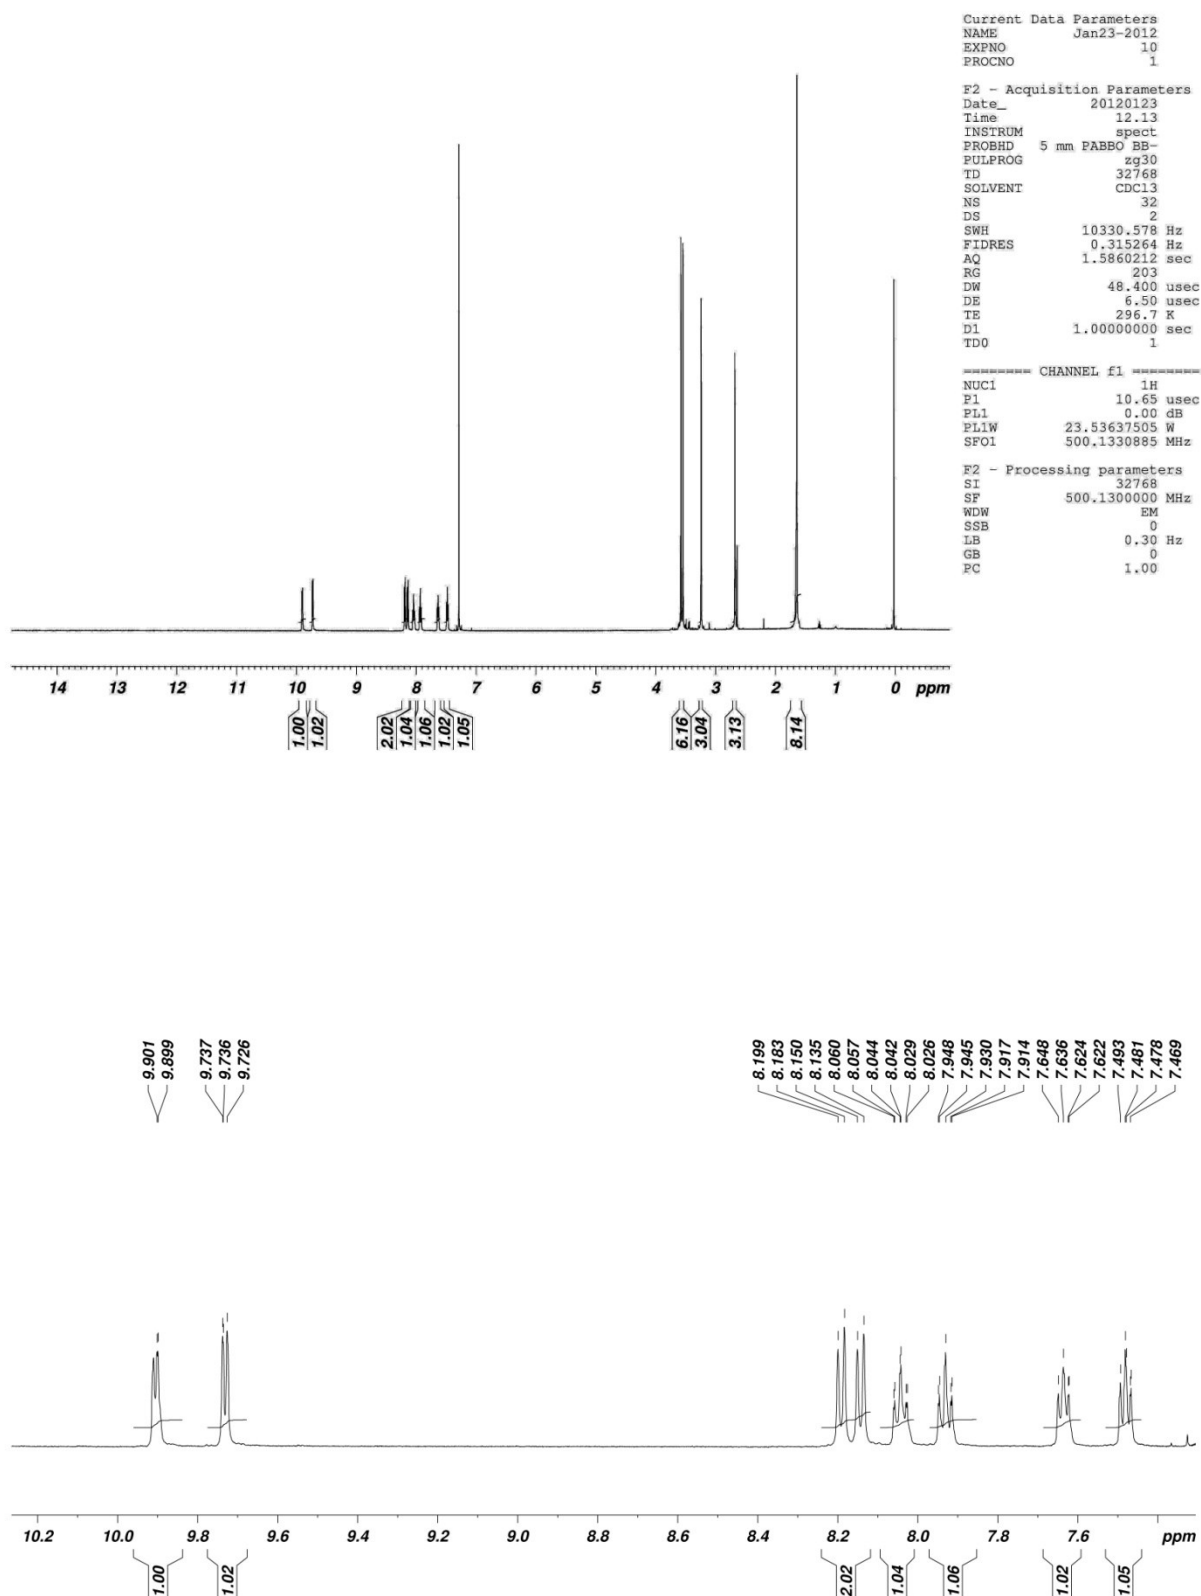

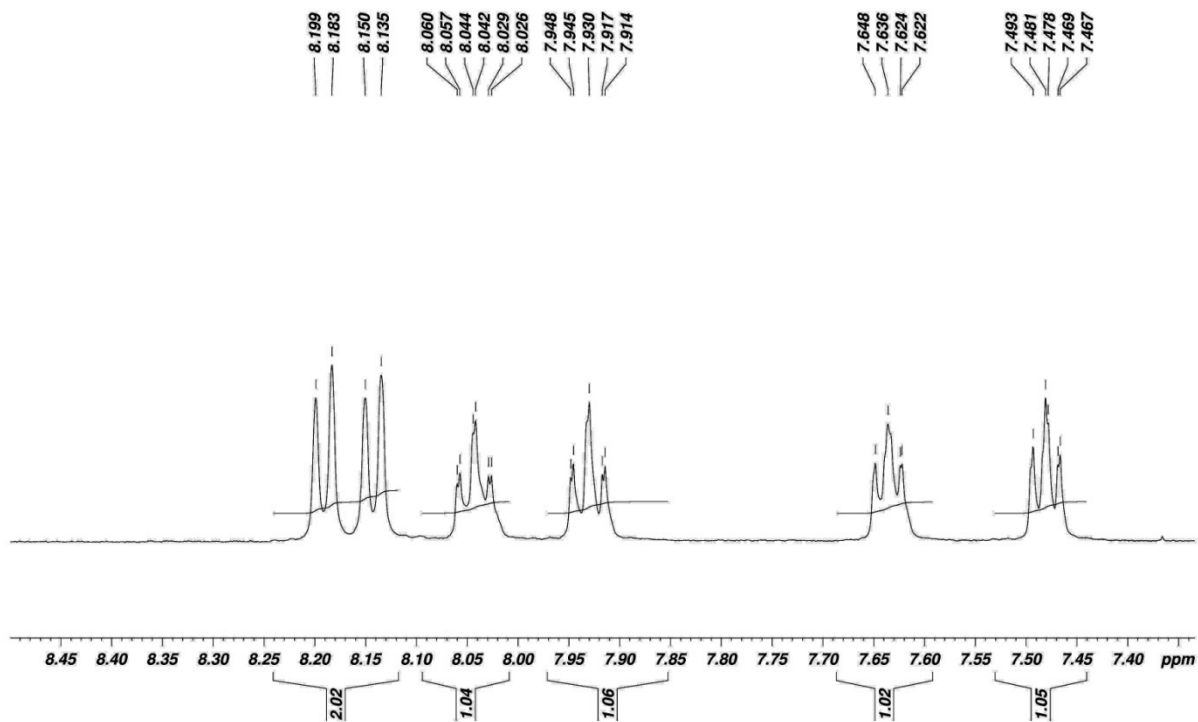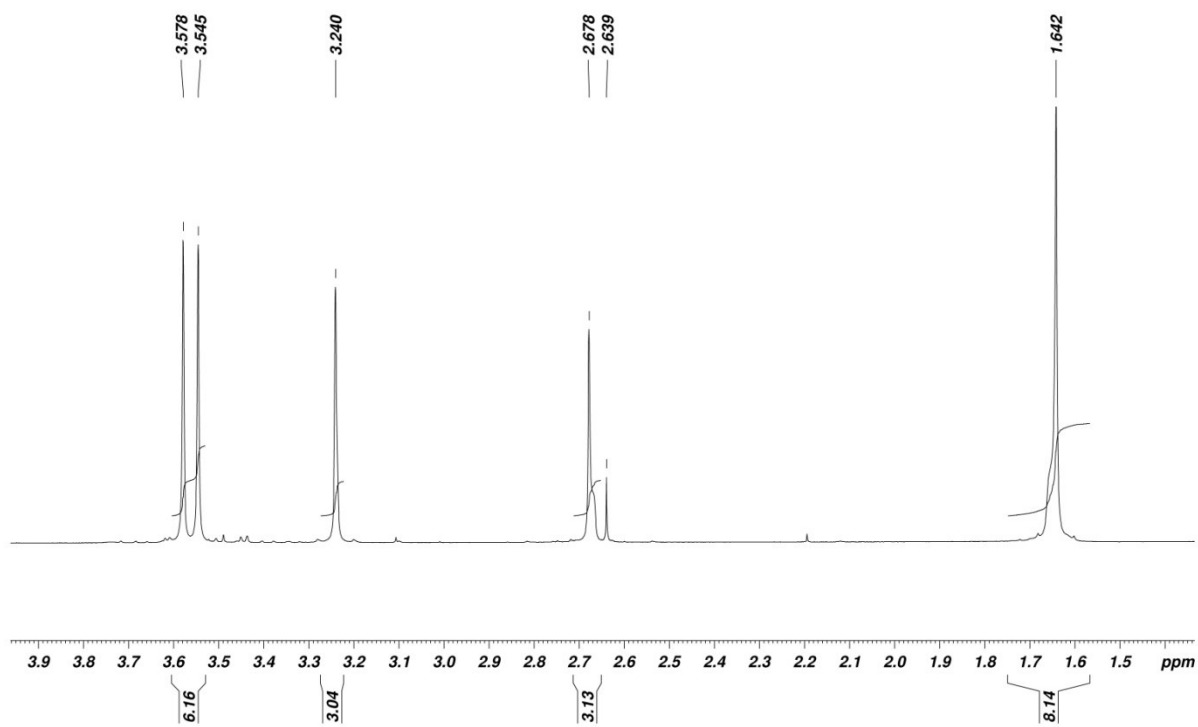

**Table S1** Selected geometrical parameters for complexes **1** and **3**

| <b>Interatomic distances (Å)</b> |             |            |                  |         |           |
|----------------------------------|-------------|------------|------------------|---------|-----------|
| <b>Complex 1</b>                 |             |            | <b>Complex 3</b> |         |           |
| Ru1A–N1A                         | 2.086(3)    | Ru1B–N1B   | 2.081(5)         | Ru1–N1  | 2.076(3)  |
| Ru1A–N2A                         | 2.077(3)    | Ru1B–N2B   | 2.087(5)         | Ru1–N2  | 2.090(3)  |
| Ru1A–S1A                         | 2.2322(15)  | Ru1B–S1B   | 2.2366(15)       | Ru1–S1  | 2.2258(9) |
| Ru1A–S2A                         | 2.2888(16)  | Ru1B–S2B   | 2.2885(15)       | Ru1–S2  | 2.291(1)  |
| Ru1A–Cl1A                        | 2.42229(14) | Ru1B–Cl1B  | 2.4209(15)       | Ru1–Cl1 | 2.414(1)  |
| Ru1A–Cl2A                        | 2.4310(15)  | Ru1B–Cl2B  | 2.4309(16)       | Ru1–Cl2 | 2.4289(9) |
| <b>Bond angles(°)</b>            |             |            |                  |         |           |
| N1A–Ru1A–N2A                     | 78.17(19)   | N1–Ru1–N2  | 78.70(1)         |         |           |
| N1A–Ru1A–S1A                     | 91.47(14)   | N1–Ru1–S1  | 91.28(8)         |         |           |
| N1A–Ru1A–S2A                     | 175.34(14)  | N1–Ru1–S2  | 100.01(8)        |         |           |
| N1A–Ru1A–Cl1A                    | 94.10(13)   | N1–Ru1–Cl1 | 170.99(8)        |         |           |
| N1A–Ru1A–Cl2A                    | 83.62(14)   | N1–Ru1–Cl2 | 85.58(8)         |         |           |
| N2A–Ru1A–S1A                     | 89.28(14)   | N2–Ru1–S1  | 91.35(8)         |         |           |
| N2A–Ru1A–S2A                     | 99.74(14)   | N2–Ru1–S2  | 175.55(8)        |         |           |
| N2A–Ru1A–Cl1A                    | 171.63(15)  | N2–Ru1–Cl1 | 93.40(8)         |         |           |
| N2A–Ru1A–Cl2A                    | 86.66(14)   | N2–Ru1–Cl2 | 85.55(8)         |         |           |
| S1A–Ru1A–S2A                     | 92.68(6)    | S1–Ru1–S2  | 92.94(4)         |         |           |
| S1A–Ru1A–Cl1A                    | 94.18(5)    | S1–Ru1–Cl1 | 93.22(4)         |         |           |
| S1A–Ru1A–Cl2A                    | 174.17(6)   | S1–Ru1–Cl2 | 175.96(4)        |         |           |
| S2A–Ru1A–Cl1A                    | 87.73(5)    | S2–Ru1–Cl1 | 87.55(4)         |         |           |
| S2A–Ru1A–Cl2A                    | 92.13(5)    | S2–Ru1–Cl2 | 90.11(4)         |         |           |
| Cl1A–Ru1A–Cl2A                   | 89.31(5)    | Cl–Ru1–Cl2 | 89.55(4)         |         |           |
| C11A–S1A–C12A                    | 96.8(3)     | C13–S1–C14 | 101.10(3)        |         |           |
| C11A–S1A–O1A                     | 107.3(3)    | C13–S1–O5  | 104.90(2)        |         |           |
| C1BA–S2A–C1CA                    | 99.1(3)     | C14–S1–O5  | 105.6(3)         |         |           |
| C1BA–S2A–O3A                     | 105.2(3)    | C15–S2–C16 | 99.50(3)         |         |           |
| N1B–Ru1B–N2B                     | 78.84(19)   | C15–S2–O6  | 106.20(2)        |         |           |
| N1B–Ru1B–S1B                     | 89.44(14)   | C16–S2–O6  | 104.20(2)        |         |           |
| N1B–Ru1B–S2B                     | 98.74(14)   |            |                  |         |           |
| N1B–Ru1B–Cl1B                    | 172.30(15)  |            |                  |         |           |
| N1B–Ru1B–Cl2B                    | 86.45(14)   |            |                  |         |           |
| N2B–Ru1B–S1B                     | 92.47(14)   |            |                  |         |           |
| N2B–Ru1B–S2B                     | 173.25(14)  |            |                  |         |           |
| N2B–Ru1B–Cl1B                    | 93.83(14)   |            |                  |         |           |
| N2B–Ru1B–Cl2B                    | 83.27(14)   |            |                  |         |           |
| S1B–Ru1B–S2B                     | 93.80(6)    |            |                  |         |           |
| S1B–Ru1B–Cl1B                    | 93.25(5)    |            |                  |         |           |
| S1B–Ru1B–Cl2B                    | 174.58(6)   |            |                  |         |           |
| S2B–Ru1B–Cl1B                    | 88.29(5)    |            |                  |         |           |
| S2B–Ru1B–Cl2B                    | 90.32(6)    |            |                  |         |           |
| Cl1B–Ru1B–Cl2B                   | 90.39(5)    |            |                  |         |           |
| C11B–S1B–C12B                    | 96.6(3)     |            |                  |         |           |
| C11B–S1B–O1B                     | 107.2(3)    |            |                  |         |           |
| C1BB–S2B–C1CB                    | 98.4(3)     |            |                  |         |           |
| C1BB–S2B–O3B                     | 105.9(3)    |            |                  |         |           |

**Fig. S2** Plot of  $[DNA]/(\varepsilon_a - \varepsilon_f)$  vs  $[DNA]$  for the titration of CT-DNA with complexes **1-3** and solid line is linear fitting of the data

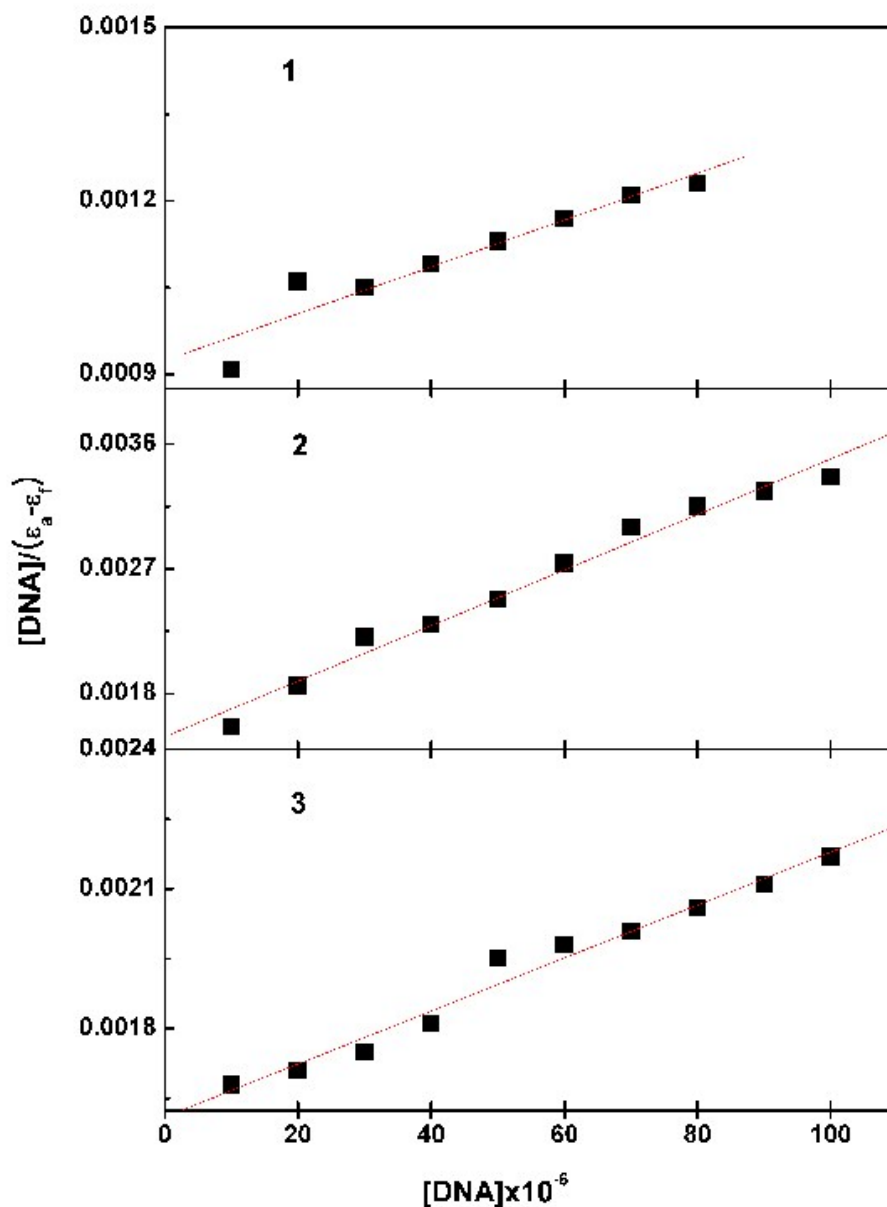

**Table S2** Correlation equation and  $R^2$  value of 1-3 for plot of  $[DNA]/(\varepsilon_a - \varepsilon_f)$  vs  $[DNA]$

| Complexes | Correlation equation              | $R^2$ value |
|-----------|-----------------------------------|-------------|
| <b>1</b>  | $y = 4 \times 10^{-6} x + 0.0009$ | 0.913       |
| <b>2</b>  | $y = 2 \times 10^{-5} x + 0.0015$ | 0.967       |
| <b>3</b>  | $y = 5 \times 10^{-6} x + 1.0016$ | 0.974       |

**Table S3 Correlation equation and R<sup>2</sup> value for EB–DNA fluorescence quenching by complexes 1-3**

| Complexes | Correlation equation    | R <sup>2</sup> value |
|-----------|-------------------------|----------------------|
| 1         | $y = -2.803 x + 100.33$ | 0.938                |
| 2         | $y = -5.005 x + 100.77$ | 0.979                |
| 3         | $y = -3.592 x + 101.20$ | 0.950                |

**Fig. S3 Stern–Volmer plots for EB–DNA quenching by the ruthenium complexes at different temperatures**

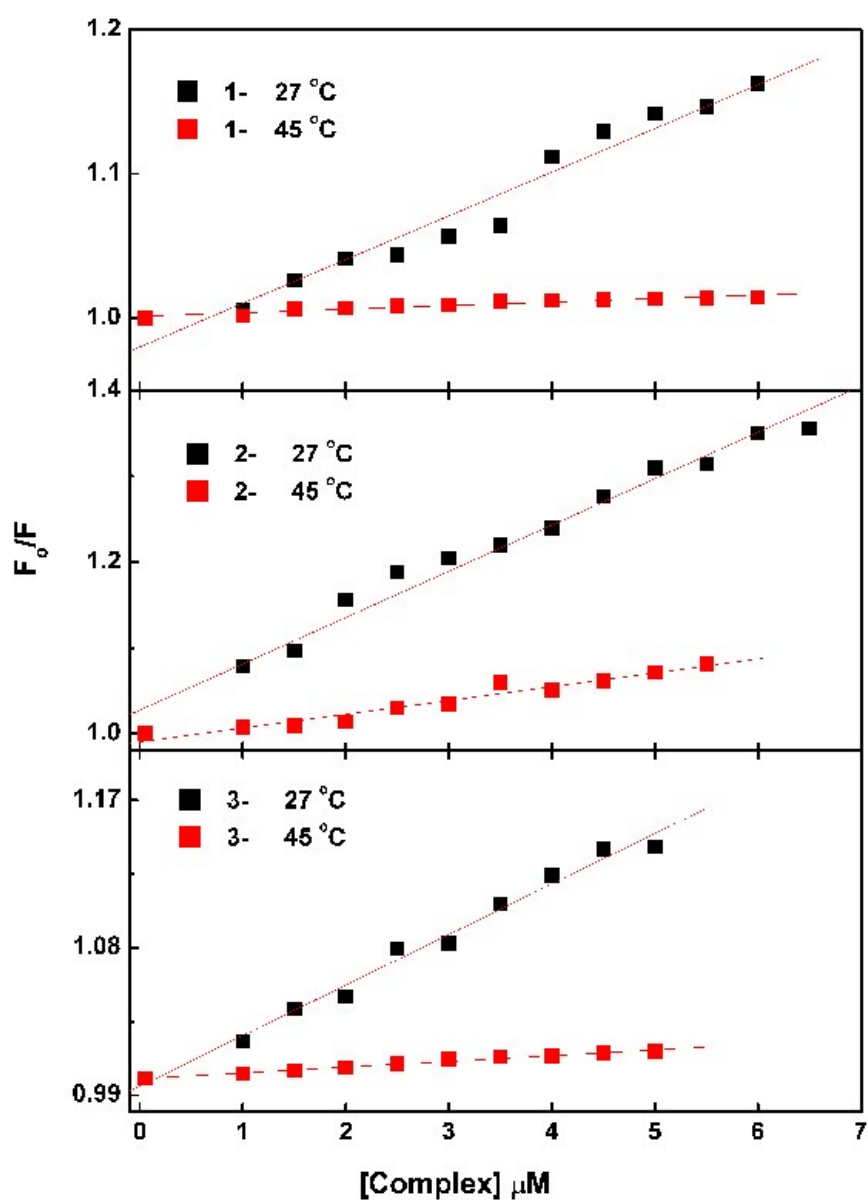

**Table S4 Correlation equation and R<sup>2</sup> value of 1-3 for Stern–Volmer plots for EB–DNA quenching by the ruthenium complexes at different temperatures**

| Complexes | Correlation equation  |                       | R <sup>2</sup> value |       |
|-----------|-----------------------|-----------------------|----------------------|-------|
|           | 27 °C                 | 45 °C                 | 27 °C                | 45 °C |
| <b>1</b>  | $y = 0.027 x + 0.970$ | $y = 0.001 x + 1.004$ | 0.969                | 0.460 |
| <b>2</b>  | $y = 0.051 x + 1.036$ | $y = 0.012 x + 1.002$ | 0.986                | 0.877 |
| <b>3</b>  | $y = 0.031 x + 0.992$ | $y = 0.004 x + 0.998$ | 0.987                | 0.984 |

**Table S5 Correlation equation and R<sup>2</sup> value of the EB and complexes on viscosity of DNA**

| Complexes | Correlation equation   | R <sup>2</sup> value |
|-----------|------------------------|----------------------|
| <b>1</b>  | $y = 0.049 x + 0.998$  | 0.094                |
| <b>2</b>  | $y = 0.060 x + 1.005$  | 0.127                |
| <b>3</b>  | $y = -0.061 x + 1.005$ | 0.134                |
| <b>EB</b> | $y = 1.393 x + 1.027$  | 0.887                |

**Fig. S4 UV-Visible absorption spectra of BSA (1 μM) in the absence and presence of the complexes 1-3 (10 μM).**

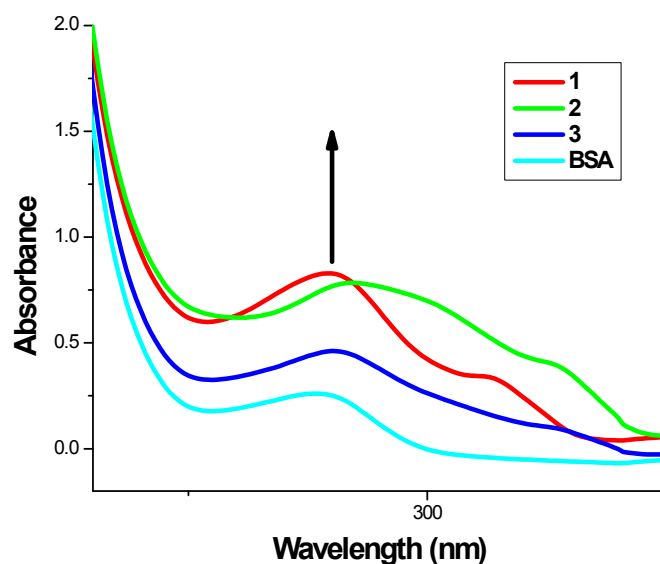



**Fig. S5** Plot of  $I_0/I$  vs  $\log [Q]$

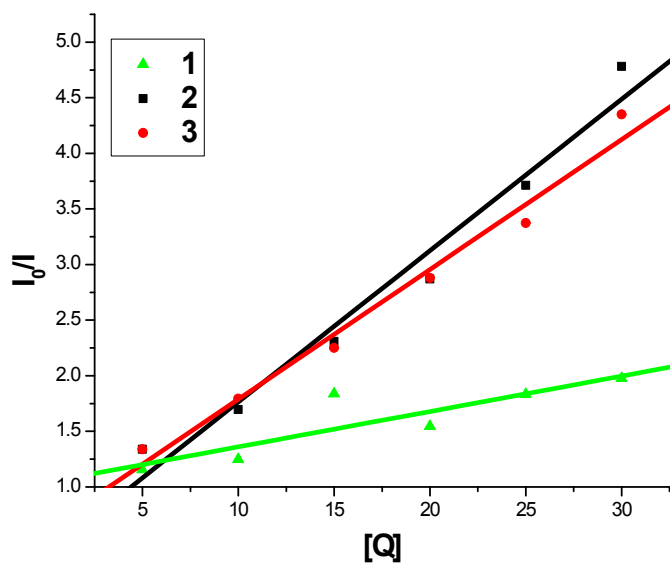

**Table S6** Correlation equation and  $R^2$  value of complexes 1-3 for plot of  $I_0/I$  vs  $\log [Q]$

| Complexes | Correlation equation  | $R^2$ value |
|-----------|-----------------------|-------------|
| <b>1</b>  | $y = 0.136 x + 0.402$ | 0.985       |
| <b>2</b>  | $y = 0.117 x + 0.622$ | 0.990       |
| <b>3</b>  | $y = 0.032 x + 1.042$ | 0.876       |

**Fig. S6** Plot of  $\log [(F_0-F)/F]$  vs  $\log [Q]$

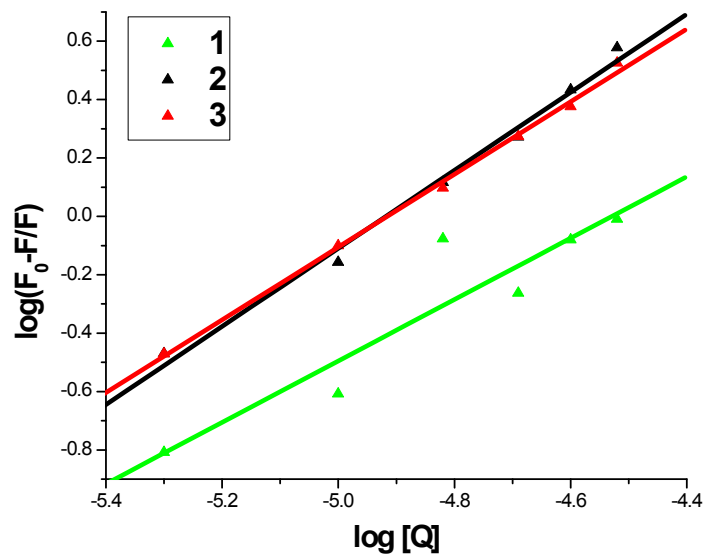

**Table S7** Correlation equation and  $R^2$  value of the complexes 1-3 for plot of  $\log [(F_0-F)/F]$  vs  $\log [Q]$

| Complexes | Correlation equation  | $R^2$ value |
|-----------|-----------------------|-------------|
| 1         | $y = 1.337 x + 6.577$ | 0.995       |
| 2         | $y = 1.246 x + 6.123$ | 0.998       |
| 3         | $y = 1.052 x + 4.763$ | 0.928       |

**Fig. S7** Synchronous spectra of BSA (1  $\mu\text{M}$ ) in the presence of increasing amounts of the complexes **1-3** for a wavelength difference of  $\Delta\lambda = 15$  nm. The arrow shows the emission intensity changes upon increasing concentration of complex

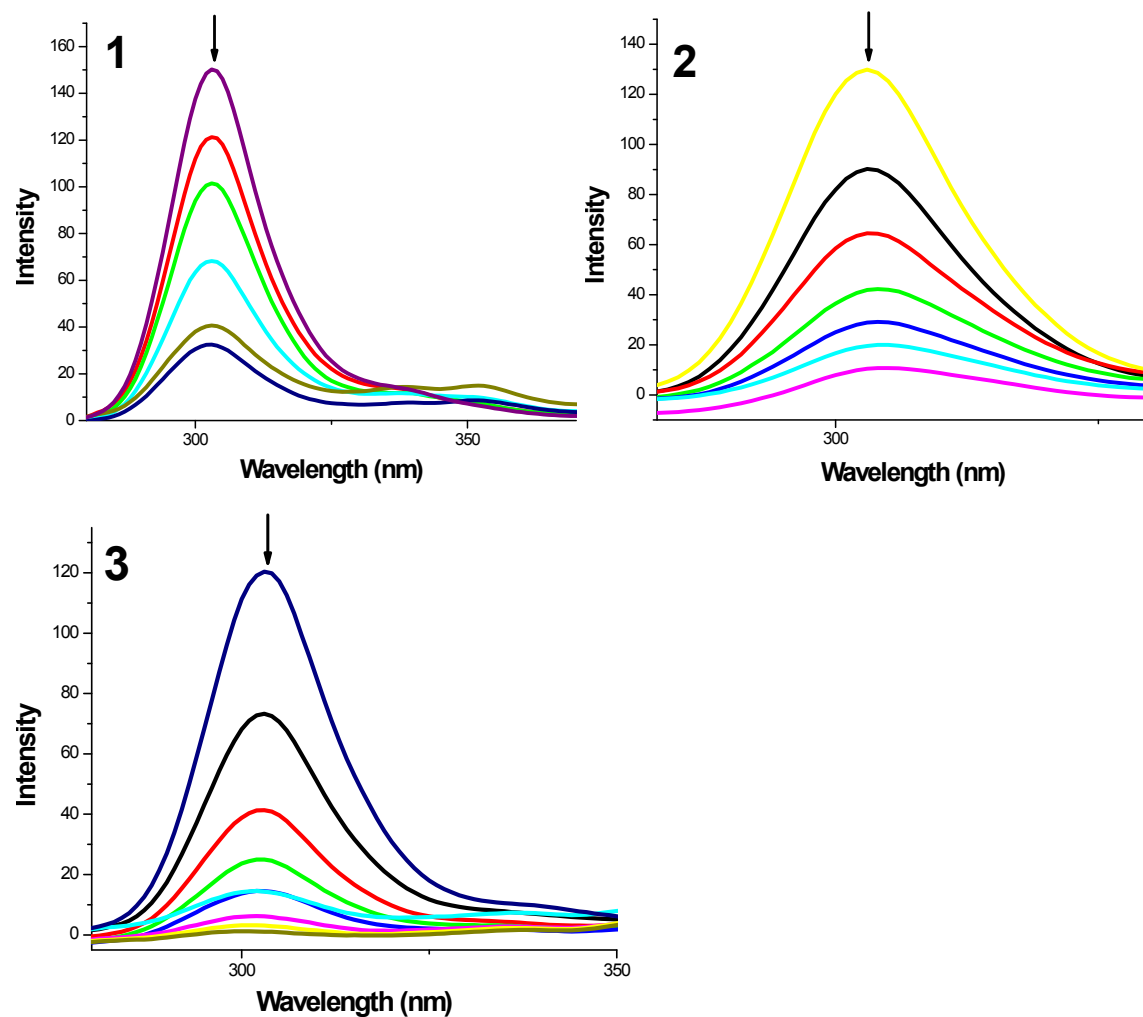

**Fig. S8** Synchronous spectra of BSA (1  $\mu\text{M}$ ) in the presence of increasing amounts of the complexes **1-3** for a wavelength difference of  $\Delta\lambda = 60$  nm. The arrow shows the emission intensity changes upon increasing concentration of compound

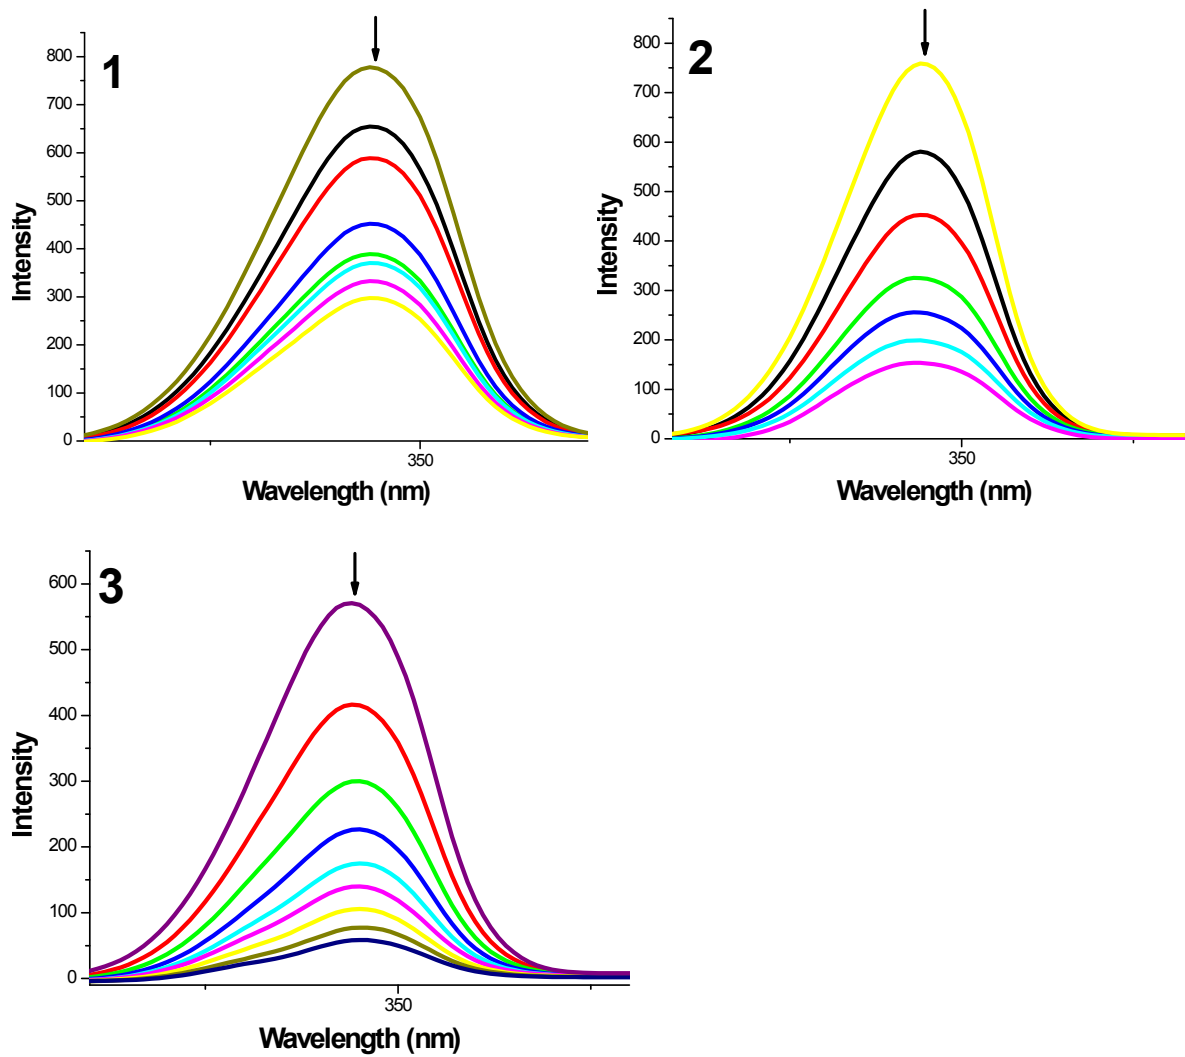

**Fig. S9** Plausible mechanisms for DPPH radical scavenging and metal chelating activity for complex **3**

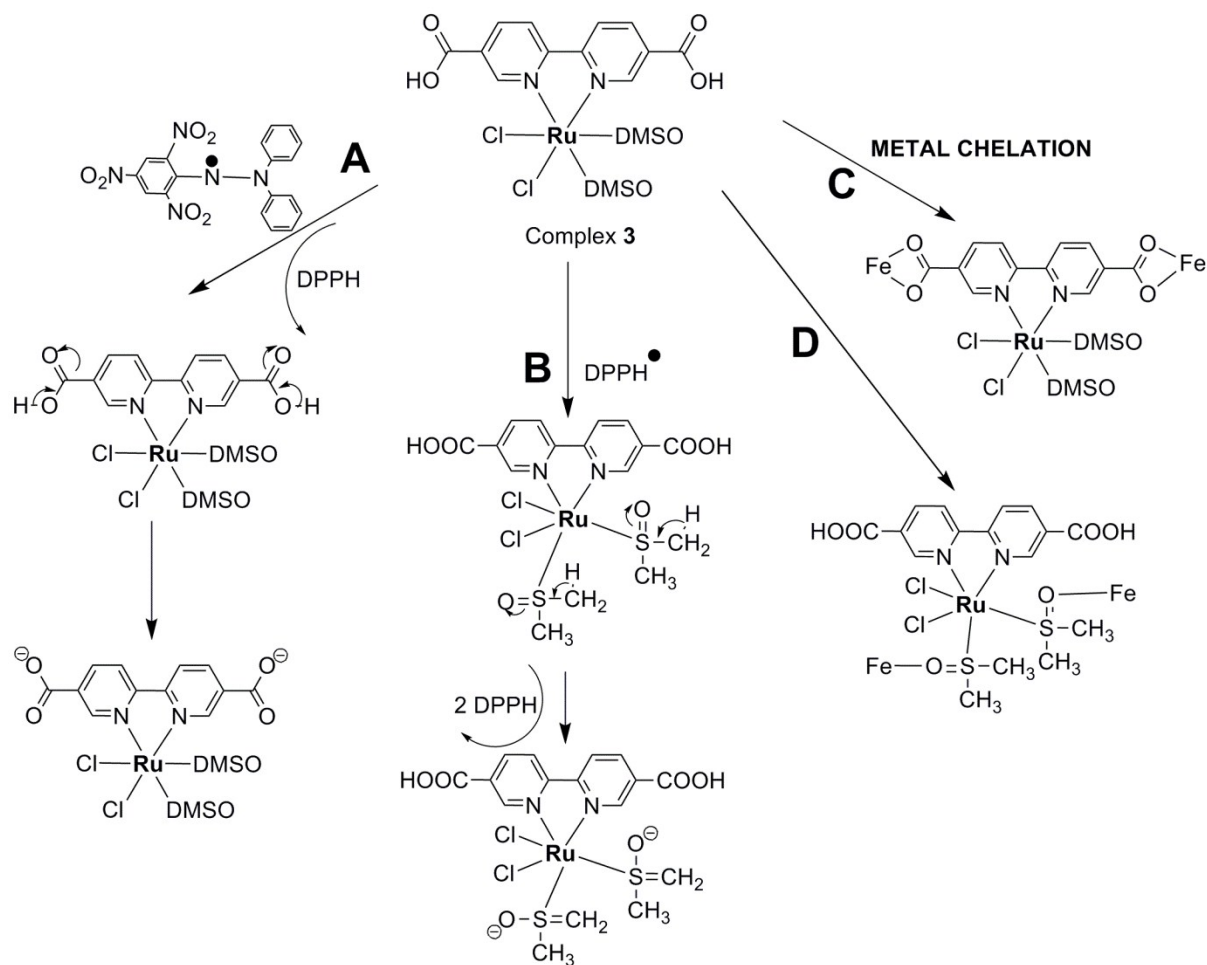

- A and B** : DPPH radical scavenging by H<sup>+</sup> donation  
**C** : Metal chelation by free carboxylic acid groups  
**D** : Coordination of Fe by neutral oxygen atom of DMSO
